# Supplementary material for: Lokiarchaea are close relatives of Euryarchaeota, not bridging the gap between prokaryotes and eukaryotes
Source: PLOS journal article supplement (doi:10.1371/journal.pgen.1006810), 2017-06-12
Supplement: S3 (10.1371/journal.pgen.1006810.s003) [file journal.pgen.1006810.s003]

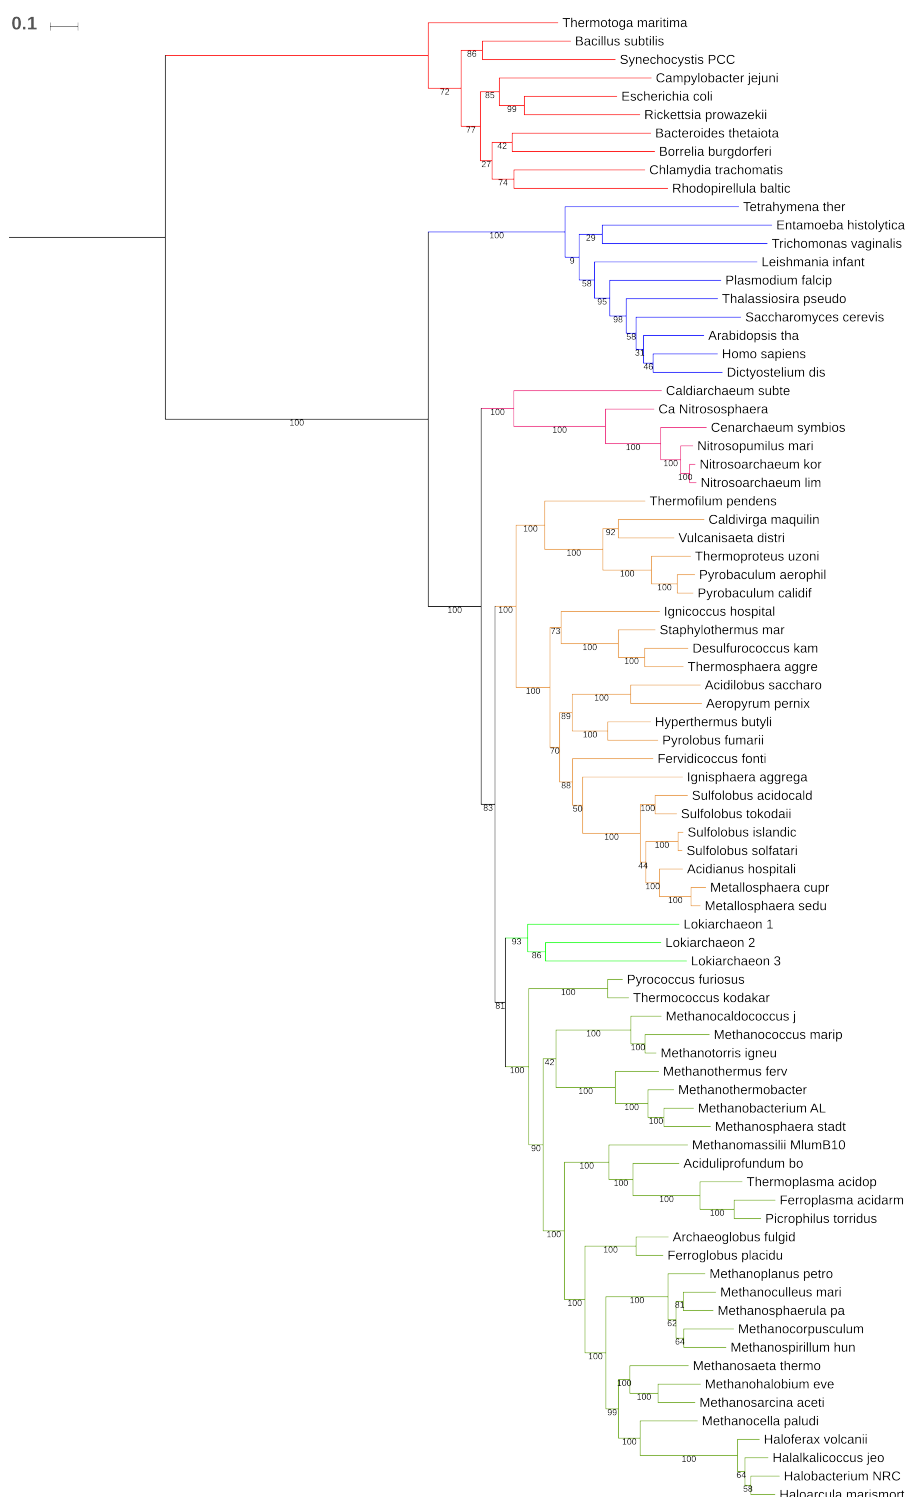

**S3 Fig – ML phylogenetic tree of the concatenation of the 11 Woese's proteins from the curated datasets (3,499 positions).**

In this tree, bacterial and eukaryotic sequences are indicated in red and blue, respectively. For Archaea, Thaumarchaeota and Aigarchaeota are indicated in pink, Crenarchaeota in orange and Euryarchaeota in olive-green. The Lokiarchaeota are indicated in light-green. The scale-bar represents the average number of substitutions per site. Values at nodes represent support calculated by nonparametric bootstrap (out of 100).
